# Supplementary material
Source: publisher figshare collection journal article supplement (https://sage.figshare.com/ndownloader/files/12944153)
Supplement: Supplementary file 1 [file 12944153]

## Appendix

**Table1: Demographic Profile, Full-time Workers with Certifications Compared to Those with Licenses.**

| Description                            | Manufacturing workers<br>with certification, no<br>license |                                  | Manufacturing workers<br>with license |                                 |
|----------------------------------------|------------------------------------------------------------|----------------------------------|---------------------------------------|---------------------------------|
|                                        | Number                                                     | Share of<br>certified<br>workers | Number                                | Share of<br>licensed<br>workers |
| Full-time employed                     | 427,887                                                    |                                  | 1,288,161                             |                                 |
| Age                                    |                                                            |                                  |                                       |                                 |
| 16 to 24 years                         | 23,656                                                     | 6%                               | 53,768                                | 4%                              |
| 25 to 40 years                         | 139,351                                                    | 33%                              | 385,752                               | 30%                             |
| 40 to 54 years                         | 171,602                                                    | 40%                              | 498,243                               | 39%                             |
| 55 years and older                     | 93,278                                                     | 22%                              | 349,814                               | 27%                             |
| Gender                                 |                                                            |                                  |                                       |                                 |
| Female                                 | 89,977                                                     | 21%                              | 288,296                               | 22%                             |
| Male                                   | 337,910                                                    | 79%                              | 999,865                               | 78%                             |
| Race                                   |                                                            |                                  |                                       |                                 |
| Asian                                  | 4,495                                                      | 1%                               | 5,659                                 | 0%                              |
| Black                                  | 37,121                                                     | 9%                               | 120,255                               | 9%                              |
| Multiracial/other                      | 38,203                                                     | 9%                               | 99,781                                | 8%                              |
| White                                  | 350,878                                                    | 82%                              | 1,063,173                             | 83%                             |
| Ethnicity                              |                                                            |                                  |                                       |                                 |
| Hispanic                               | 48,405                                                     | 11%                              | 130,885                               | 10%                             |
| Non-Hispanic                           | 379,483                                                    | 89%                              | 1,157,276                             | 90%                             |
| Citizenship                            |                                                            |                                  |                                       |                                 |
| Native U.S. citizen                    | 365,584                                                    | 85%                              | 1,141,793                             | 89%                             |
| Naturalized U.S. citizen               | 36,244                                                     | 8%                               | 91,385                                | 7%                              |
| Noncitizen                             | 26,060                                                     | 6%                               | 54,983                                | 4%                              |
| Unionization                           |                                                            |                                  |                                       |                                 |
| Union member or covered by<br>contract | 11,362                                                     | 3%                               | 40,695                                | 3%                              |
| Not covered by union contract          | 91,519                                                     | 21%                              | 258,698                               | 20%                             |
| Education                              |                                                            |                                  |                                       |                                 |
| No high school diploma                 | 12,103                                                     | 3%                               | 56,471                                | 4%                              |
| High school graduate or<br>equivalent  | 91,834                                                     | 21%                              | 331,242                               | 26%                             |
| Some college or associate<br>degree    | 154,190                                                    | 36%                              | 451,807                               | 35%                             |
| Bachelor's degree                      | 101,782                                                    | 24%                              | 269,559                               | 21%                             |
| Advanced degree                        | 67,979                                                     | 16%                              | 179,081                               | 14%                             |
| Occupational group                     |                                                            |                                  |                                       |                                 |
| Administrative support                 | 21,232                                                     | 5%                               | 77,562                                | 6%                              |
| Business / finance                     | 26,658                                                     | 6%                               | 64,769                                | 5%                              |

|                                |         |     |         |     |
|--------------------------------|---------|-----|---------|-----|
| Computer                       | 26,390  | 6%  | 25,382  | 2%  |
| Construction                   | 10,114  | 2%  | 56,251  | 4%  |
| Engineering, science, and tech | 58,730  | 14% | 147,977 | 11% |
| Installers                     | 34,009  | 8%  | 95,749  | 7%  |
| Management                     | 81,244  | 19% | 166,129 | 13% |
| Production                     | 119,521 | 28% | 372,289 | 29% |
| Sales                          | 6,722   | 2%  | 45,649  | 4%  |
| Transportation                 | 24,654  | 6%  | 157,290 | 12% |
| Miscellaneous / other          | 18,613  | 4%  | 79,114  | 6%  |

**Table 2: Median Weekly Earnings, Workers with Licenses or Certifications.**

| Description                         | Certificati<br>on only | License |
|-------------------------------------|------------------------|---------|
| Full-time employed                  | \$1,107                | \$1,011 |
| Age                                 |                        |         |
| 16 to 24 years                      | \$750                  | \$682   |
| 25 to 40 years                      | \$1,028                | \$920   |
| 40 to 54 years                      | \$1,356                | \$1,084 |
| 55 years and older                  | \$1,261                | \$1,189 |
| Gender                              |                        |         |
| Female                              | \$1,164                | \$921   |
| Male                                | \$1,097                | \$1,029 |
| Race                                |                        |         |
| Asian                               | \$2,160                | \$920   |
| Black                               | \$1,012                | \$750   |
| Multiracial/other                   | \$1,399                | \$1,075 |
| White                               | \$1,111                | \$1,059 |
| Ethnicity                           |                        |         |
| Hispanic                            | \$923                  | \$926   |
| Non-Hispanic                        | \$1,135                | \$1,037 |
| Citizenship                         |                        |         |
| Native U.S. citizen                 | \$1,084                | \$1,008 |
| Naturalized U.S. citizen            | \$1,419                | \$1,214 |
| Noncitizen                          | \$1,196                | \$1,183 |
| Unionization                        |                        |         |
| Union member or covered by contract | \$1,006                | \$1,106 |
| Not covered by union contract       | \$1,154                | \$999   |
| Education                           |                        |         |
| No high school diploma              | \$801                  | \$723   |
| High school graduate or equivalent  | \$846                  | \$862   |
| Some college or associate degree    | \$975                  | \$920   |
| Bachelor's degree                   | \$1,556                | \$1,311 |
| Advanced degree                     | \$1,714                | \$1,833 |
| Occupational group                  |                        |         |

|                                |         |         |
|--------------------------------|---------|---------|
| Administrative support         | \$843   | \$806   |
| Business / finance             | \$1,726 | \$1,704 |
| Computer                       | \$1,366 | \$1,335 |
| Construction                   | \$1,048 | \$1,205 |
| Engineering, science, and tech | \$1,515 | \$1,515 |
| Installers                     | \$1,050 | \$1,076 |
| Management                     | \$1,818 | \$1,554 |
| Production                     | \$831   | \$799   |
| Sales                          | \$1,149 | \$1,339 |
| Transportation                 | \$699   | \$794   |
| Miscellaneous / other          | \$1,347 | \$1,319 |

**Table 3: Detailed Regression Results, Factors Influencing Weekly Earnings (log) for Full-Time Manufacturing Workers that do not have a License or Certification.**

|                        |        |
|------------------------|--------|
| Number of observations | 23,551 |
| <i>F</i> statistic     | 575.9  |
| Prob > <i>F</i>        | 0.00   |
| <i>R</i> -squared      | 0.44   |

|                                     | Coef.  | Std.<br>Err. | <i>t</i> | <i>P</i> >  <i>t</i> |
|-------------------------------------|--------|--------------|----------|----------------------|
| Constant                            | 5.960  | 0.041        | 145.03   | 0.000                |
| Female                              | -0.217 | 0.008        | -28.20   | 0.000                |
| Asian                               | -0.085 | 0.054        | -1.58    | 0.113                |
| Black                               | -0.146 | 0.013        | -11.58   | 0.000                |
| Multi/other                         | -0.062 | 0.015        | -4.19    | 0.000                |
| Hispanic                            | -0.106 | 0.012        | -9.00    | 0.000                |
| Noncitizen                          | -0.106 | 0.013        | -8.13    | 0.000                |
| Age                                 | 0.039  | 0.002        | 22.35    | 0.000                |
| Age squared                         | 0.000  | 0.000        | -17.85   | 0.000                |
| Union member or covered by contract | 0.101  | 0.011        | 8.91     | 0.000                |
| High school graduate or equivalent  | 0.201  | 0.012        | 16.67    | 0.000                |
| Some college or associate degree    | 0.264  | 0.013        | 20.01    | 0.000                |
| Bachelor's degree                   | 0.545  | 0.015        | 35.33    | 0.000                |
| Advanced degree                     | 0.664  | 0.020        | 33.06    | 0.000                |
| Administrative support              | -0.414 | 0.017        | -24.78   | 0.000                |
| Business / finance                  | -0.157 | 0.019        | -8.33    | 0.000                |
| Computer                            | -0.030 | 0.021        | -1.40    | 0.160                |
| Construction                        | -0.374 | 0.026        | -14.26   | 0.000                |
| Engineering, science, and tech      | -0.094 | 0.015        | -6.19    | 0.000                |
| Installers                          | -0.299 | 0.020        | -14.69   | 0.000                |

|                                  |        |       |        |       |
|----------------------------------|--------|-------|--------|-------|
| Production                       | -0.484 | 0.014 | -35.61 | 0.000 |
| Sales                            | -0.292 | 0.023 | -12.92 | 0.000 |
| Transportation                   | -0.564 | 0.019 | -29.54 | 0.000 |
| Miscellaneous / other occupation | -0.403 | 0.023 | -17.46 | 0.000 |
| Large metro                      | 0.066  | 0.009 | 7.18   | 0.000 |
| Midsized metro                   | 0.039  | 0.008 | 4.86   | 0.000 |
| Northeast                        | -0.037 | 0.012 | -3.09  | 0.002 |
| Midwest                          | -0.068 | 0.010 | -6.50  | 0.000 |
| Southeast                        | -0.063 | 0.010 | -6.21  | 0.000 |

---

**Table 4: Detailed Regression Results, Factors Influencing Weekly Earnings (log) for Full-Time Manufacturing Workers with a License or Certification.**

| Number of observations              | 3,010  |              |          |                      |
|-------------------------------------|--------|--------------|----------|----------------------|
| <i>F</i> statistic                  | 51.12  |              |          |                      |
| Prob > <i>F</i>                     | 0.00   |              |          |                      |
| <i>R</i> -squared                   | 0.33   |              |          |                      |
|                                     | Coef.  | Std.<br>Err. | <i>t</i> | <i>P</i> >  <i>t</i> |
| Constant                            | 5.775  | 0.141        | 40.83    | 0.000                |
| Female                              | -0.213 | 0.025        | -8.37    | 0.000                |
| Asian                               | 0.232  | 0.164        | 1.41     | 0.158                |
| Black                               | -0.238 | 0.036        | -6.57    | 0.000                |
| Multi/other                         | -0.014 | 0.039        | -0.36    | 0.717                |
| Hispanic                            | -0.114 | 0.035        | -3.25    | 0.001                |
| Noncitizen                          | -0.050 | 0.046        | -1.10    | 0.271                |
| Age                                 | 0.051  | 0.006        | 8.71     | 0.000                |
| Age squared                         | 0.000  | 0.000        | -7.30    | 0.000                |
| Union member or covered by contract | 0.092  | 0.041        | 2.23     | 0.025                |
| High school graduate or equivalent  | 0.135  | 0.055        | 2.47     | 0.013                |
| Some college or associate degree    | 0.165  | 0.055        | 3.00     | 0.003                |
| Bachelor's degree                   | 0.345  | 0.061        | 5.63     | 0.000                |
| Advanced degree                     | 0.517  | 0.063        | 8.17     | 0.000                |
| Administrative Support              | -0.374 | 0.055        | -6.85    | 0.000                |
| Business / finance                  | 0.070  | 0.053        | 1.33     | 0.184                |
| Computer                            | -0.081 | 0.065        | -1.24    | 0.214                |
| Construction                        | -0.253 | 0.069        | -3.65    | 0.000                |
| Engineering, science, and tech      | -0.031 | 0.045        | -0.69    | 0.490                |
| Installers                          | -0.217 | 0.051        | -4.23    | 0.000                |
| Production                          | -0.381 | 0.047        | -8.14    | 0.000                |
| Sales                               | -0.200 | 0.084        | -2.38    | 0.017                |
| Transportation                      | -0.441 | 0.052        | -8.52    | 0.000                |
| Miscellaneous / other occupation    | -0.132 | 0.055        | -2.39    | 0.017                |
| Large metro                         | 0.108  | 0.026        | 4.21     | 0.000                |
| Midsized metro                      | 0.028  | 0.024        | 1.18     | 0.237                |
| Northeast                           | -0.046 | 0.033        | -1.42    | 0.155                |
| Midwest                             | -0.010 | 0.028        | -0.36    | 0.717                |
| Southeast                           | -0.041 | 0.030        | -1.35    | 0.177                |
